# Supplementary material for: Mono-substitution of symmetric diesters: selectivity of Mycobacterium smegmatis acyltransferase variants
Source: Royal Society of Chemistry journal article supplement (doi:10.1039/c9cy01181a), 2019-01-01
Supplement: c9cy01181a1.pdf [file c9cy01181a1.pdf]

## Mono-substitution of symmetric diesters: Selectivity of *Mycobacterium smegmatis* Acyltransferase variants

Maja Finnveden<sup>1</sup>, Stefan Semlitsch<sup>1</sup>, Oscar He and Mats Martinelle

<sup>1</sup>These authors contributed equally

KTH Royal Institute of Technology, Department of Industrial Biotechnology, School of Engineering Sciences in Chemistry, Biotechnology and Health, AlbaNova University Center, SE-106 91 Stockholm, Sweden

E-mail: [matsm@kth.se](mailto:matsm@kth.se)

### Electronic supplementary information

#### Biocatalytic route for mono-substitution of divinyl adipate

<sup>1</sup>H-NMR of structures of end points for the reactions between DVA and either 1-octanol or BVE catalyzed by MsAct wild type and variants: wt, L12A, T93A/F154A.

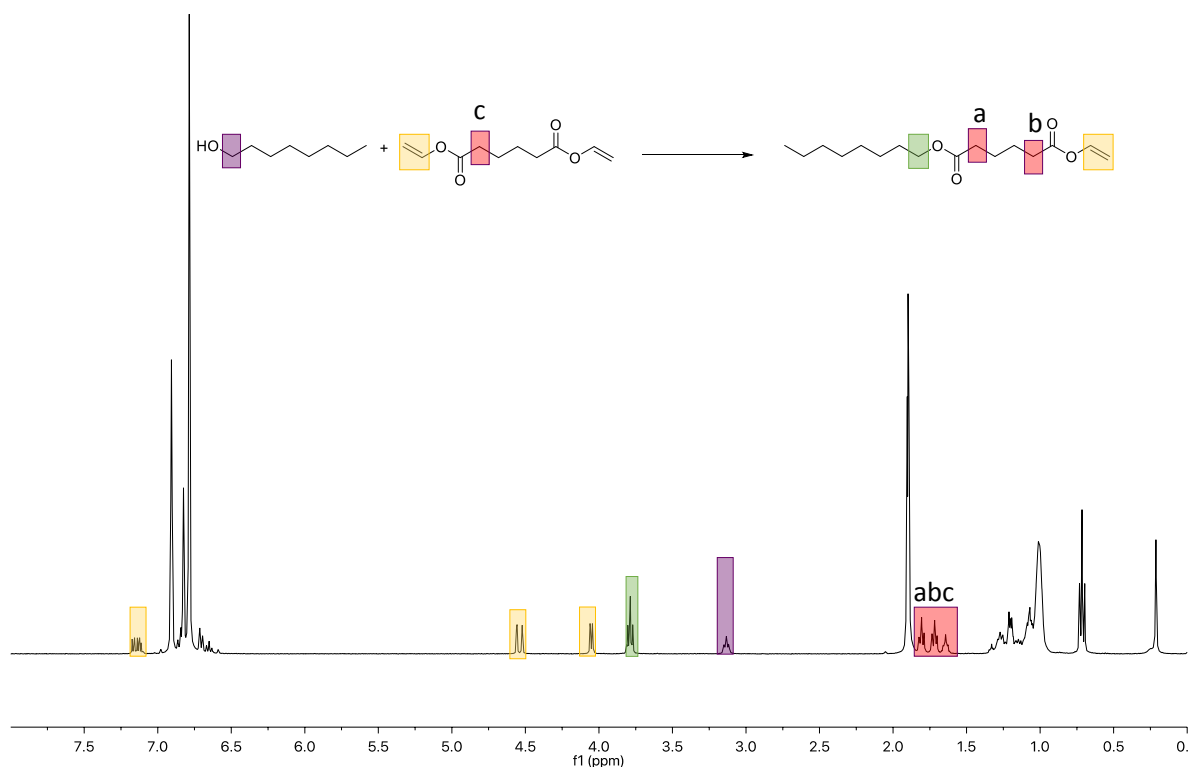

**Figure S 1** <sup>1</sup>H-NMR of endpoint from the reaction between DVA and 1-octanol catalyzed by MsAct wt

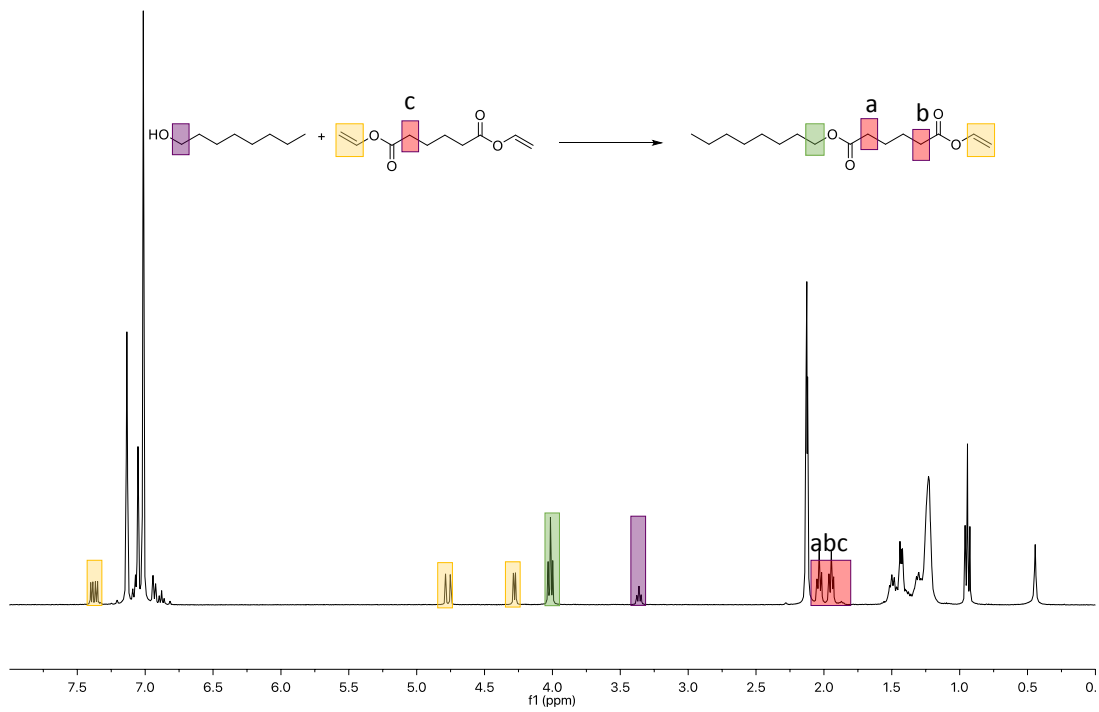

**Figure S 2**  $^1\text{H-NMR}$  of endpoint from the reaction between DVA and 1-octanol catalyzed by MsAcT L12A

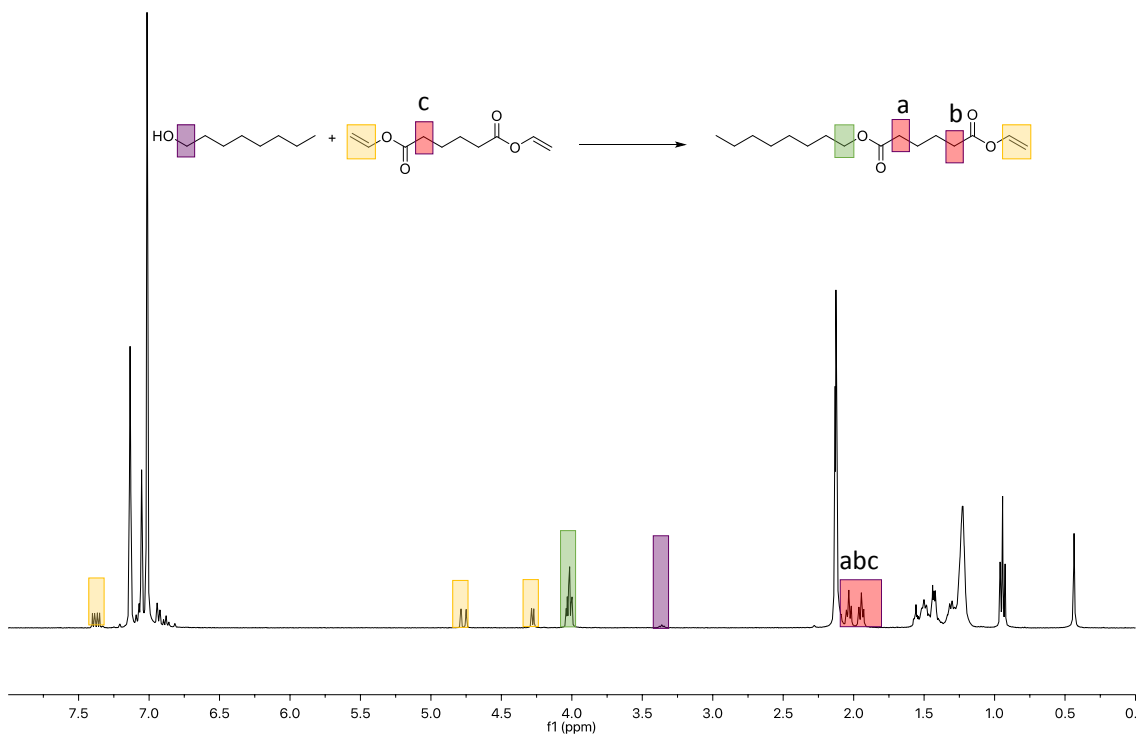

**Figure S 3**  $^1\text{H-NMR}$  of endpoint from the reaction between DVA and 1-octanol catalyzed by MsAcT T93A/F154A

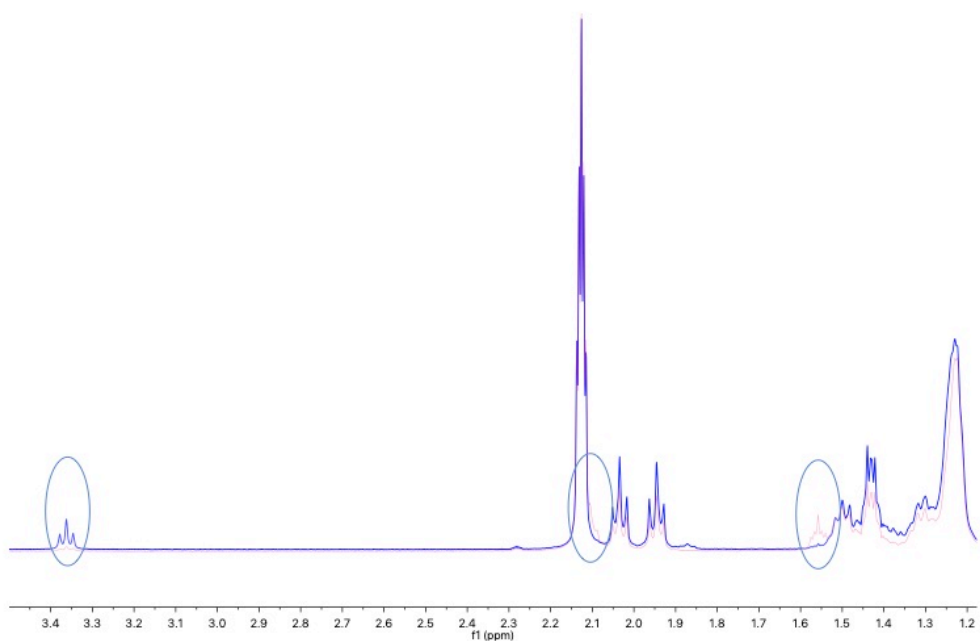

**Figure S 4** Figure S2 and S3 superimposed. Spectrum from the reaction catalyzed by MsAcT L12A (Figure S2) shown in dark blue and spectrum from the reaction catalyzed by MsAcT T93A/F154A (Figure S3) shown in pink. The blue markings highlight difference in peaks corresponding to di-substituted DVA.

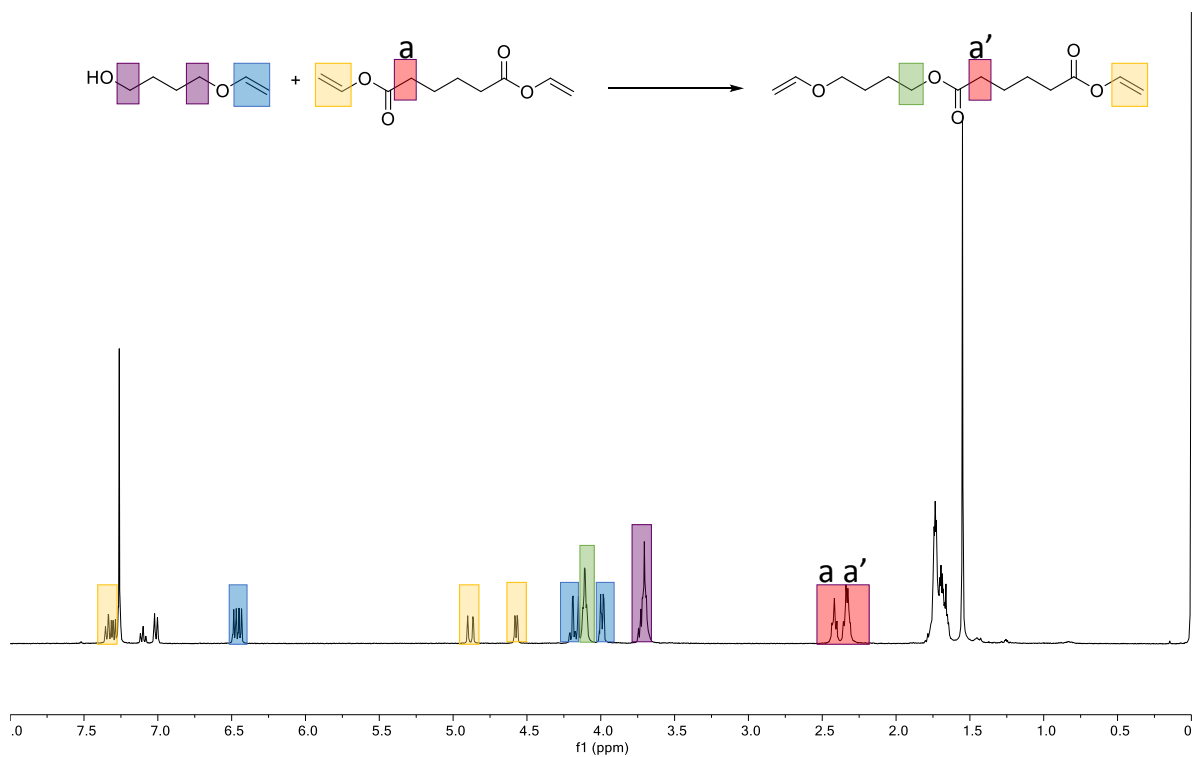

**Figure S 5**  $^1\text{H-NMR}$  of endpoint from the reaction between DVA and BVE catalyzed by MsAcT wt

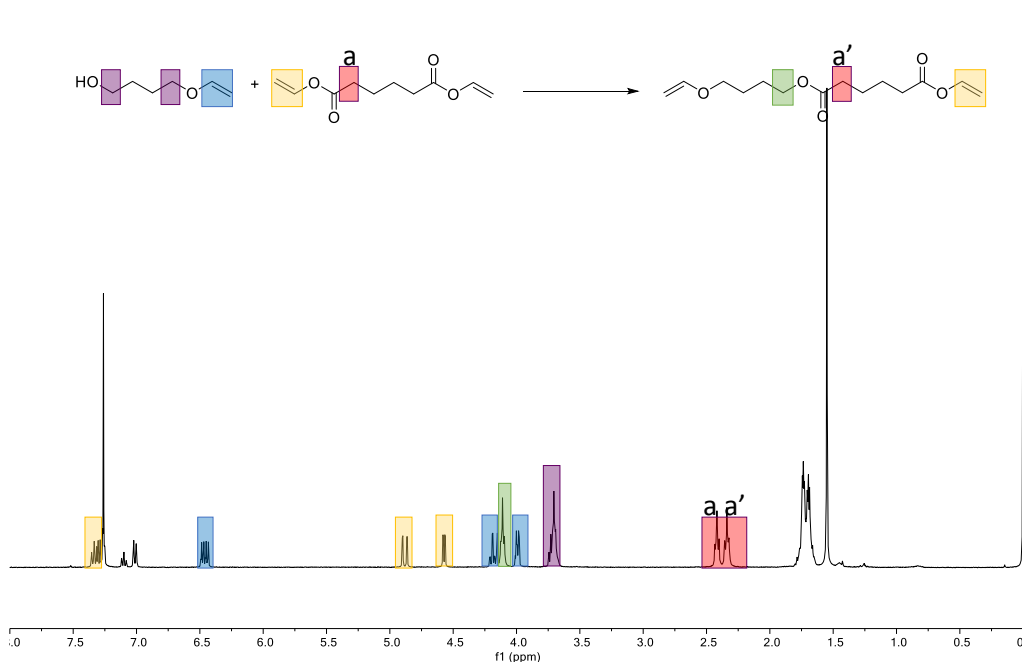

**Figure S 6** <sup>1</sup>H-NMR of endpoint from the reaction between DVA and BVE catalyzed by MsAct L12A

The ratio between the acyl donor (DVA) and acyl acceptor (BVE) was 1:1.5 however the ratio between functional groups is 2:1.5 DVA:BVE, i.e. when full conversion of DVA and BVE is shown in GC spectra and the distribution between mono and di-substituted product is 50%. The integrals of the peaks corresponding to the vinyl groups on DVA will be 25% of their start value in spectra obtained from <sup>1</sup>H-NMR, which is observed from the reaction catalysed by MsAct T93A/F154A.

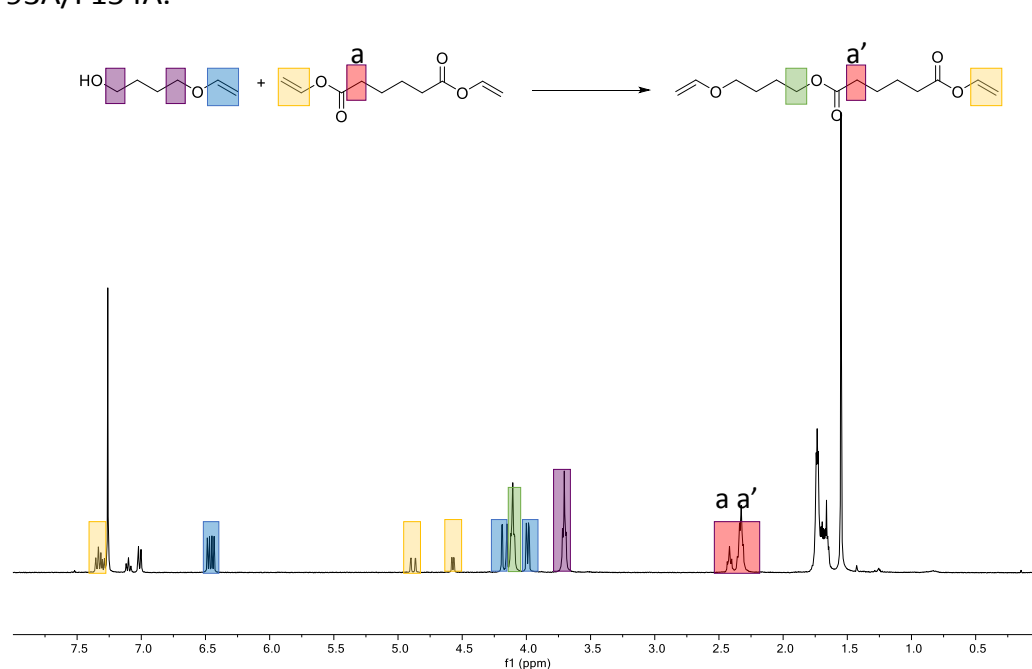

**Figure S 7** <sup>1</sup>H-NMR of endpoint from the reaction between DVA and BVE catalyzed by MsAct T93A/F154A

## Enzyme selectivity

Initial reaction velocities of MsAcT catalyzed transacylation of a mixture of methyl esters: succinate (C4), adipate (C6), suberate (C8) and sebacate (C10), Fig S8-S10. The conversions were calculated from product formation using relative response factors according to Scanlon et al. (1) The enzyme selectivity is the ratio of specificities (kcat/KM) towards the substrates and was determined from the initial reaction velocities by allowing the acyl donors to compete with each other.

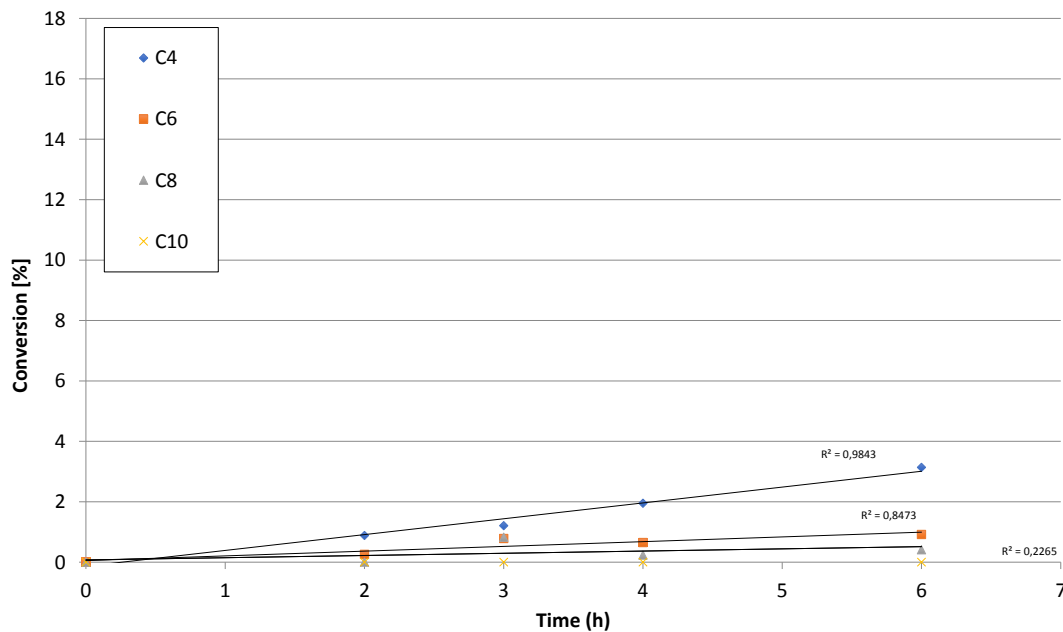

**Figure S 8** Initial velocities of the transacylation reactions catalyzed by MsAcT wt.

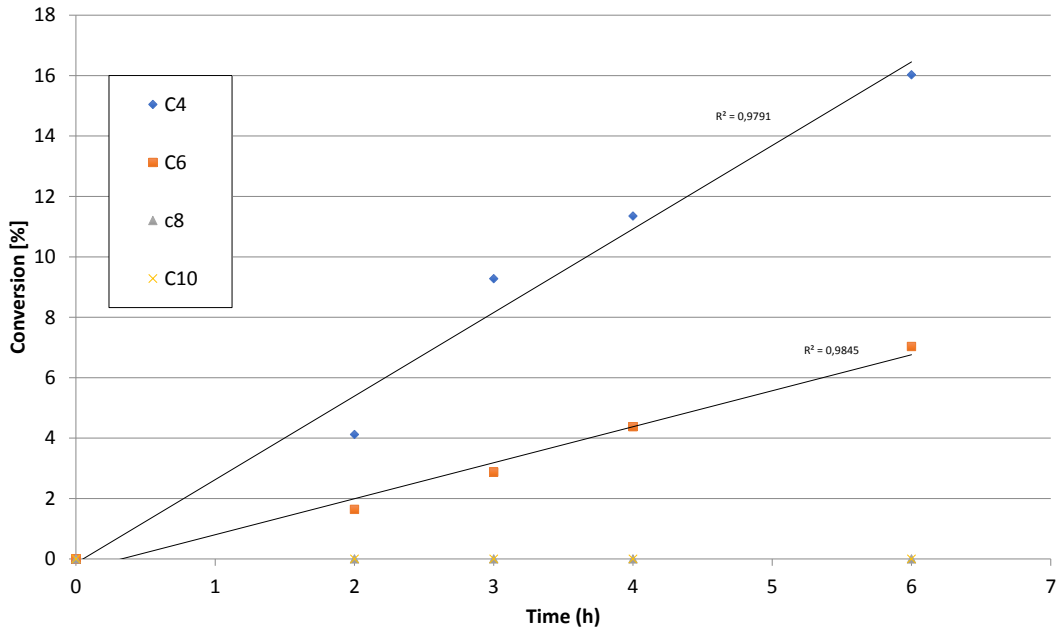

**Figure S 9** Initial velocities of the transacylation reactions catalyzed by MsAcT L12A

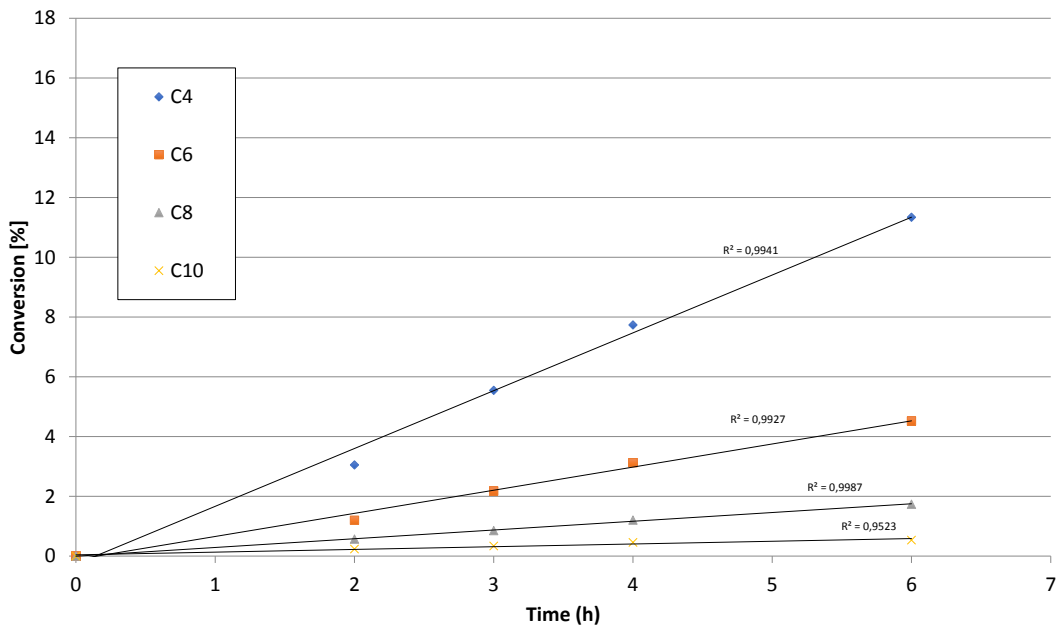

**Figure S 10** Initial velocities of the transacylation reactions catalyzed by MsAcT T93A/F154A

1. Scanlon JT, Willis DE. Calculation of Flame Ionization Detector Relative Response Factors Using the Effective Carbon Number Concept. J Chromatogr Sci. 1985;23(8):333-40.
